# Supplementary material for: Selective Decontamination of the Digestive Tract to Prevent Postoperative Pneumonia and Anastomotic Leakage after Esophagectomy: A Retrospective Cohort Study
Source: PubMed Central journal article supplement (PMC7824731; doi:10.3390/antibiotics10010043), 2021-01-05
Supplement: antibiotics-10-00043-s001.pdf [file antibiotics-10-00043-s001.pdf]

## Supplementary Material

**Table S1. Univariate and multivariate analysis of factors associated with postoperative pneumonia after Ivor Lewis totally minimally invasive esophagectomy.**

|                                      | Univariate       |                  | Multivariate <sup>a</sup> |                  |
|--------------------------------------|------------------|------------------|---------------------------|------------------|
|                                      | OR (95% CI)      | P value          | OR (95% CI)               | P value          |
| <b>Patient characteristics</b>       |                  |                  |                           |                  |
| Sex                                  |                  |                  |                           |                  |
| Male                                 | <i>ref</i>       |                  |                           |                  |
| Female                               | 0.62 (0.35-1.08) | 0.093            |                           |                  |
| Age <sup>b</sup>                     | 1.21 (0.95-1.52) | 0.115            |                           |                  |
| Body mass index (kg/m <sup>2</sup> ) | 1.01 (0.97-1.06) | 0.651            | 1.01 (0.96-1.07)          | 0.615            |
| ASA classification                   |                  | 0.666            |                           |                  |
| 1                                    | <i>ref</i>       |                  |                           |                  |
| 2                                    | 1.11 (0.59-2.08) | 0.748            |                           |                  |
| ≥3                                   | 1.31 (0.66-2.59) | 0.437            |                           |                  |
| Charlson Comorbidity Index           |                  | 0.115            |                           | 0.069            |
| 0                                    | <i>ref</i>       |                  | <i>ref</i>                |                  |
| 1                                    | 1.06 (0.68-1.65) | 0.809            | 1.14 (0.70-1.86)          | 0.607            |
| ≥2                                   | 1.68 (1.02-2.77) | <u>0.042</u>     | 1.87 (1.10-3.20)          | <u>0.021</u>     |
| Tumour histology                     |                  | 0.371            |                           |                  |
| Adenocarcinoma                       | <i>ref</i>       |                  |                           |                  |
| Squamous cell carcinoma              | 0.81 (0.44-1.50) | 0.507            |                           |                  |
| Other                                | 0.26 (0.03-2.10) | 0.207            |                           |                  |
| Tumour stage                         |                  | 0.961            |                           |                  |
| I                                    | <i>ref</i>       |                  |                           |                  |
| II                                   | 1.01 (0.63-1.62) | 0.976            |                           |                  |
| III                                  | 0.95 (0.56-1.59) | 0.835            |                           |                  |
| Tumour location                      |                  | 0.161            |                           |                  |
| Mid esophagus                        | <i>ref</i>       |                  |                           |                  |
| Distal esophagus                     | 1.00 (0.43-2.35) | 1.000            |                           |                  |
| Junction                             | 1.54 (0.62-3.82) | 0.347            |                           |                  |
| <b>Surgical characteristics</b>      |                  |                  |                           |                  |
| Year of surgery                      |                  | 0.355            |                           | 0.818            |
| 2012-2013                            | <i>ref</i>       |                  | <i>ref</i>                |                  |
| 2014-2015                            | 0.61 (0.34-1.09) | 0.095            | 1.07 (0.54-2.15)          | 0.842            |
| 2016-2017                            | 0.83 (0.48-1.44) | 0.511            | 1.17 (0.61-2.25)          | 0.628            |
| 2018                                 | 0.86 (0.43-1.72) | 0.667            | 1.500 (0.63-3.58)         | 0.361            |
| Duration of surgery <sup>c</sup>     | 1.00 (0.94-1.09) | 0.599            | 0.97 (0.89-1.09)          | 0.720            |
| Nr. of resected lymph nodes          | 1.02 (1.00-1.05) | 0.065            | 1.02 (0.99-1.04)          | 0.213            |
| Blood loss (ml) <sup>d</sup>         | 1.00 (0.91-1.11) | 0.821            | 1.00 (0.91-1.11)          | 0.965            |
| Conversion of surgery                |                  |                  |                           |                  |
| No                                   | <i>ref</i>       |                  |                           |                  |
| Yes                                  | 0.38 (0.11-1.33) | 0.131            |                           |                  |
| Use of SDD                           |                  |                  |                           |                  |
| No                                   | <i>ref</i>       |                  | <i>ref</i>                |                  |
| Yes                                  | 0.43 (0.28-0.66) | <u>&lt;0.001</u> | 0.40 (0.23-0.67)          | <u>&lt;0.001</u> |

Nr. number, SDD selective decontamination of the digestive tract, OR odds ratio, CI confidence interval, *ref* reference

<sup>a</sup> Model consists of BMI, Charlson Comorbidity Index, year of surgery, duration of surgery, number of lymph nodes resected, blood loss and use of SDD

<sup>b</sup> OR per 10 years increase in age (per 1 year increase in age: univariate OR 1.019; 95% CI: 0.995-1.043)

<sup>c</sup> OR per 30 minute increase in duration of surgery (per 1 minute increase in surgery: univariate OR 1.000; 95% CI: 0.998-1.003, multivariate OR 0.999; 95% CI: 0.996-1.003)

<sup>d</sup>OR per 100 millilitre increase in blood loss (per 1 millilitre increase in blood loss: univariate OR 1.000; 95% CI: 0.999-1.001, multivariate OR 1.000; 95% CI: 0.999-1.001)

**Table S2. Univariate and multivariate analysis of factors associated with anastomotic leakage after Ivor Lewis totally minimally invasive esophagectomy.**

|                                      | Univariate        |              | Multivariate <sup>a</sup> |              |
|--------------------------------------|-------------------|--------------|---------------------------|--------------|
|                                      | OR (95% CI)       | P value      | OR (95% CI)               | P value      |
| <b>Patient characteristics</b>       |                   |              |                           |              |
| Sex                                  |                   |              |                           |              |
| Male                                 | <i>ref</i>        |              |                           |              |
| Female                               | 0.61 (0.29-1.27)  | 0.184        |                           |              |
| Age <sup>b</sup>                     | 1.07 (0.80-1.42)  | 0.655        |                           |              |
| Body mass index (kg/m <sup>2</sup> ) | 1.05 (0.99-1.11)  | 0.116        | 1.04 (0.98-1.10)          | 0.188        |
| ASA classification                   |                   | 0.581        |                           |              |
| 1                                    | <i>ref</i>        |              |                           |              |
| 2                                    | 1.42 (0.61-3.30)  | 0.419        |                           |              |
| ≥3                                   | 1.62 (0.65-4.00)  | 0.299        |                           |              |
| Charlson Comorbidity Index           |                   | 0.963        |                           |              |
| 0                                    | <i>ref</i>        |              |                           |              |
| 1                                    | 1.00 (0.59-1.72)  | 0.990        |                           |              |
| ≥2                                   | 0.92 (0.48-1.77)  | 0.796        |                           |              |
| Tumour histology                     |                   | 0.365        |                           |              |
| Adenocarcinoma                       | <i>ref</i>        |              |                           |              |
| Squamous cell carcinoma              | 0.86 (0.39-1.90)  | 0.706        |                           |              |
| Other                                | 2.63 (0.64-10.78) | 0.179        |                           |              |
| Tumour stage                         |                   | 0.895        |                           |              |
| I                                    | <i>ref</i>        |              |                           |              |
| II                                   | 1.02 (0.57-1.83)  | 0.948        |                           |              |
| III                                  | 0.89 (0.47-1.71)  | 0.733        |                           |              |
| Tumour location                      |                   | 0.387        |                           |              |
| Mid esophagus                        | <i>ref</i>        |              |                           |              |
| Distal esophagus                     | 2.70 (0.62-11.69) | 0.184        |                           |              |
| Junction                             | 2.89 (0.63-13.18) | 0.171        |                           |              |
| <b>Surgical characteristics</b>      |                   |              |                           |              |
| Year of surgery                      |                   | 0.466        |                           | 0.521        |
| 2012-2013                            | <i>ref</i>        |              | <i>ref</i>                |              |
| 2014-2015                            | 0.60 (0.30-1.20)  | 0.146        | 0.81 (0.38-1.69)          | 0.565        |
| 2016-2017                            | 0.79 (0.41-1.52)  | 0.484        | 0.75 (0.39-1.46)          | 0.396        |
| 2018                                 | 0.61 (0.25-1.47)  | 0.268        | 0.49 (0.19-1.25)          | 0.135        |
| Duration of surgery <sup>c</sup>     | 1.06 (1.00-1.16)  | 0.109        | 1.00 (1.00-1.01)          | 0.087        |
| Nr. of resected lymph nodes          | 1.00 (0.97-1.03)  | 0.889        |                           |              |
| Blood loss (ml) <sup>d</sup>         | 1.00 (0.91-1.11)  | 0.942        |                           |              |
| Conversion of surgery                |                   |              |                           |              |
| No                                   | <i>ref</i>        |              |                           |              |
| Yes                                  | 0.55 (0.13-2.42)  | 0.429        |                           |              |
| Use of SDD                           |                   |              |                           |              |
| No                                   | <i>ref</i>        |              | <i>ref</i>                |              |
| Yes                                  | 0.48 (0.28-0.83)  | <u>0.009</u> | 0.46 (0.26-0.84)          | <u>0.011</u> |

Nr. number, SDD selective decontamination of the digestive tract, OR odds ratio, CI confidence interval, *ref* reference

<sup>a</sup> Model consists of BMI, year of surgery, duration of surgery and use of SDD

<sup>b</sup> OR per 10 years increase in age (per 1 year increase in age: univariate OR 1.007; 95% CI: 0.987-1.036)

<sup>c</sup> OR per 30 minute increase in duration of surgery (per 1 minute increase in surgery: univariate OR 1.002; 95% CI: 1.000-1.005, multivariate OR 1.003; 95% CI: 1.000-1.006)

<sup>d</sup> OR per 100 millilitre increase in blood loss (per 1 millilitre increase in blood loss: univariate OR 1.000; 95% CI: 0.999-1.001)

**Table S3. Univariate and multivariate analysis of factors associated with all-cause 1-year mortality after Ivor Lewis totally minimally invasive esophagectomy.**

|                                      | Univariate        |                  | Multivariate <sup>a</sup> |              |
|--------------------------------------|-------------------|------------------|---------------------------|--------------|
|                                      | OR (95% CI)       | P value          | OR (95% CI)               | P value      |
| <b>Patient characteristics</b>       |                   |                  |                           |              |
| Sex                                  |                   |                  |                           |              |
| Male                                 | <i>ref</i>        |                  |                           |              |
| Female                               | 0.83 (0.45-1.53)  | 0.543            |                           |              |
| Age <sup>b</sup>                     | 1.38 (1.06-1.81)  | <u>0.016</u>     | 1.36 (1.02-1.81)          | <u>0.037</u> |
| Body mass index (kg/m <sup>2</sup> ) | 1.020 (0.97-1.07) | 0.457            |                           |              |
| ASA classification                   |                   | <u>0.026</u>     |                           |              |
| 1                                    | <i>ref</i>        |                  |                           |              |
| 2                                    | 0.87 (0.43-1.75)  | 0.692            |                           |              |
| ≥3                                   | 1.68 (0.80-3.56)  | 0.173            |                           |              |
| Charlson Comorbidity Index           |                   | <u>0.010</u>     |                           | 0.065        |
| 0                                    | <i>ref</i>        |                  | <i>ref</i>                |              |
| 1                                    | 1.59 (0.96-2.64)  | 0.074            | 1.30 (0.75-2.25)          | 0.345        |
| ≥2                                   | 2.31 (1.32-4.02)  | <u>0.003</u>     | 2.01 (1.12-3.60)          | <u>0.020</u> |
| Tumour histology                     |                   | 0.783            |                           |              |
| Adenocarcinoma                       | <i>Ref</i>        |                  |                           |              |
| Squamous cell carcinoma              | 0.77 (0.37-1.61)  | 0.492            |                           |              |
| Other                                | 1.08 (0.22-5.47)  | 0.922            |                           |              |
| Tumour stage                         |                   | <u>0.001</u>     |                           | <u>0.009</u> |
| I                                    | <i>ref</i>        |                  | <i>ref</i>                |              |
| II                                   | 2.93 (1.53-5.64)  | <u>0.001</u>     | 2.71 (1.39-5.29)          | <u>0.004</u> |
| III                                  | 3.68 (1.85-7.33)  | <u>&lt;0.001</u> | 2.89 (1.36-6.12)          | <u>0.006</u> |
| Tumour location                      |                   | 0.815            |                           |              |
| Mid esophagus                        | <i>ref</i>        |                  |                           |              |
| Distal esophagus                     | 1.15 (0.45-2.93)  | 0.775            |                           |              |
| Junction                             | 0.97 (0.35-2.69)  | 0.956            |                           |              |
| <b>Surgical characteristics</b>      |                   |                  |                           |              |
| Year of surgery                      |                   | <u>0.049</u>     |                           |              |
| 2012-2013                            | <i>ref</i>        |                  |                           |              |
| 2014-2015                            | 1.36 (0.73-2.55)  | 0.338            |                           |              |
| 2016-2017                            | 0.74 (0.39-1.41)  | 0.361            |                           |              |
| 2018                                 | 1.91 (0.75-4.87)  | 0.173            |                           |              |
| Duration of surgery <sup>c</sup>     | 1.09 (1.00-1.16)  | <u>0.026</u>     | 1.06 (1.00-1.16)          | 0.073        |
| Nr. of resected lymph nodes          | 0.99 (0.97-1.02)  | 0.618            |                           |              |
| Blood loss (ml) <sup>d</sup>         | 0.90 (0.82-1.00)  | 0.262            |                           |              |
| Conversion of surgery                |                   |                  |                           |              |
| No                                   | <i>ref</i>        |                  |                           |              |
| Yes                                  | 2.29 (0.91-5.76)  | 0.078            |                           |              |
| Use of SDD                           |                   |                  |                           |              |
| No                                   | <i>ref</i>        |                  | <i>ref</i>                |              |
| Yes                                  | 1.53 (0.99-2.38)  | 0.057            | 1.31 (0.80-2.14)          | 0.278        |

Nr. number, SDD selective decontamination of the digestive tract, OR odds ratio, CI confidence interval, *ref* reference

<sup>a</sup> Model consists of age, Charlson Comorbidity Index, tumour stage, duration of surgery and use of SDD.

<sup>b</sup> OR per 10 years increase in age (per 1 year increase in age: univariate OR 1.033; 95% CI: 1.006-1.061, multivariate OR 1.312; 95% CI: 1.002-1.061)

<sup>c</sup> OR per 30 minute increase in duration of surgery (per 1 minute increase in surgery: univariate OR 1.003; 95% CI: 1.000-1.005, multivariate OR 1.002; 95% CI: 1.00-1.005)

<sup>d</sup> OR per 100 millilitre increase in blood loss (per 1 millilitre increase in blood loss: univariate OR 0.999; 95% CI: 0.998-1.000)
